# Supplementary material for: Designed fabrication of three-dimensional δ-MnO2-cladded CuCo2O4 composites as an outstanding supercapacitor electrode material
Source: Royal Society of Chemistry journal article supplement (doi:10.1039/c8nj03774d), 2018-01-01
Supplement: c8nj03774d1.pdf [file c8nj03774d1.pdf]

## Supporting information

### Designed fabrication of three-dimensional $\delta$ - $\text{MnO}_2$ -cladded $\text{CuCo}_2\text{O}_4$ composites as an outstanding supercapacitor electrode material

Mingjun Pang <sup>a b</sup>, Shang Jiang <sup>a c \*</sup>, Jianguo Zhao <sup>a \*</sup>, Sufang Zhang <sup>a</sup>, Rui Liu <sup>a</sup>,  
Wenshan Qu <sup>a</sup>, Qiliang Pan <sup>a</sup>, Baoyan Xing <sup>a</sup>, Ling Gu <sup>a</sup>, Haiqing Wang <sup>a</sup>

<sup>a</sup> Institute of Carbon Materials Science, Shanxi Datong University, Datong 037009,  
China.

<sup>b</sup> Key Laboratory of Physics and Technology for Advanced Batteries, Ministry of  
Education, College of Physics, Jilin University, Changchun, 130012, China.

<sup>c</sup> State Key Laboratory of Inorganic Synthesis and Preparative Chemistry, Jilin  
University, Changchun 130012, P.R. China.

\* Corresponding author.

E-mail: 15835210812@163.com (S. Jiang), pangmj0861@163.com (J. G. Zhao)

**Supplementary method S1:** As shown in Fig. 5b and S1, Trasatti method analysis was used to analyze the capacitance configuration of  $\delta$  -  $\text{MnO}_2$ -cladded  $\text{CuCo}_2\text{O}_4$ . According to the theory of Dunn et al.<sup>[1]</sup>, the total current of the electrode at a fixed potential comprises two separate mechanisms, described by the equation of  $i(V) = K_1v^{1/2} + K_2v$  and  $i(V)/v^{1/2} = K_1 + K_2v^{1/2}$  (Eq. 1), based on the power law relationship of  $i = av^{1/2}$  for Faradaic process arising from redox reactions, and  $i = av$  for the capacitive-controlled processes. The current values at a fixed potential can be determined by the cyclic voltammograms at various scan rates of 5-20  $\text{mV s}^{-1}$ . By drawing plots of  $i(V) / v^{1/2}$  vs.  $v^{1/2}$ , the values of  $K_1$  (intercept) and  $K_2$  (slop) at a fixed voltage can be calculated. From this procedure, the series  $K_1$  and  $K_2$  values at different voltages can be quantified, thus the diffusion-controlled current ( $K_1v^{1/2}$ ) and capacitive-controlled current ( $K_2v$ ) be determined, respectively.

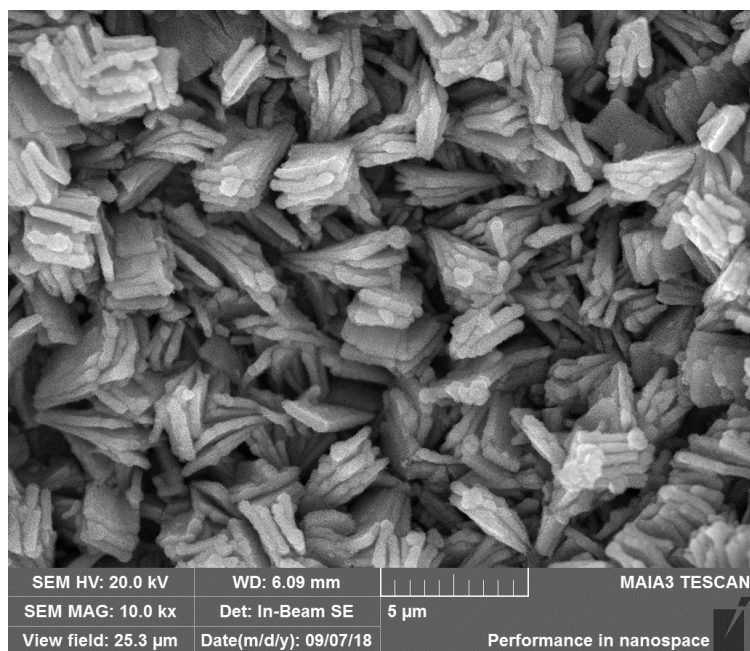

Fig. S1 SEM image of the CCO@MO electrode after 5000 cycles charge/discharge at  $15 \text{ Ag}^{-1}$ .

[1] J. Wang, J. Polleux, J. Lim, and B. Dunn, *J. Phys. Chem. C* 111 (2007) 14925-14931.
